# Supplementary material
Source: publisher figshare collection journal article supplement (https://gsajournals.figshare.com/ndownloader/files/14676758)
Supplement: Supplementary file 1 [file 14676758]

FullName	Pedigree	GossBLUE
Ames2338:81N4HABXX:7:250033662	(TWAN X TZUH)-S6	4.4723792939567
PI601558:81FENABXX:3:250034836	11430	3.07237929395649
PI267166:81FENABXX:6:250035220	2 KM 368 INBRED	1.05218170675091
PI601005:81FE8ABXX:3:250032182	207	1.41666666666667
PI601559:81FE8ABXX:1:250031915	2369	1.01716969543699
PI601808:81FE8ABXX:1:250031936	2FACC	2.40218170675091
PI601560:81N4HABXX:6:250033611	2MA22	2.39562675006395
PI415088:81FE8ABXX:4:250032331	4581 INBRED	1.41666666666667
PI601300:81FE8ABXX:1:250031885	4676A	1.79166666666667
PI198894:81FE8ABXX:5:250032470	4F-259 HQ	3.70833333333333
PI198901:81FENABXX:5:250035090	4F-342 CM 4	4.07237929395649
PI601745:81FE7ABXX:6:250031639	4N506	1.41201414178135
Ames2336:81FE7ABXX:5:250031533	52220	0.999999999999999
PI601269:81N4HABXX:7:250033718	5707	1.21820125088427
PI358532:81N4HABXX:5:250033411	676A-348-68(B)	1.26258972542923
PI601561:81FE7ABXX:4:250031396	6M502	1.5
PI601489:81FENABXX:1:250033809	740	0.987410274570759
PI601374:81FE8ABXX:5:250032400	764	1.17237929395649
PI601301:81FE7ABXX:4:250031364	78002A	2.78706364674738
PI601210:81FENABXX:1:250033834	78004	2.66666666666666
PI601211:81N4HABXX:7:250033651	78010	1.77237929395649
PI601438:81N4HABXX:6:250033530	78371A	1.29166666666667
PI601562:81FENABXX:3:250034800	78551S	1.72235949197008
PI601491:81N4HABXX:6:250033546	790	1.70218170675091
NSL243016:81N4HABXX:6:250033579	792	2.15407694123743
PI601492:81FE8ABXX:5:250032460	793	1.87237929395649
PI601377:81FENABXX:1:250033866	794	2.79166666666667
PI601563:81N4HABXX:6:250033533	87916W	1.23741027457076
Ames12814:81FE8ABXX:1:250031891	89S4083	2.60218170675091
Ames12819:81FE8ABXX:1:250031873	89S4125	2.375
Ames12821:81FE8ABXX:1:250031934	89S4145	3.125
Ames12823:81N4HABXX:6:250033553	89S4157	1.625
NSL30903:81FENABXX:2:250034669	90	2.375
PI406106:81FE7ABXX:4:250031457	A14NW	3.79166666666666
PI221735:81N4HABXX:3:250033210	A15-1 INBRED (POTCHEFSTROOM PEARL)	2.875
Ames23398:81FENABXX:2:250034722	A166	3.29166666666666
Ames23402:81FENABXX:4:250034979	A208	1.375
Ames23405:81FE8ABXX:6:250032535	A239	3.16666666666667
Ames23406:81FE8ABXX:5:250032412	A251	1.03070125088427
NSL81596:81FENABXX:3:250034882	A258	3.4223792939565
Ames23408:81FENABXX:3:250034827	A260	2.25
Ames23415:81FENABXX:2:250034736	A295	2.10218170675091
PI221811:81FENABXX:5:250035101	A302-1-2(S10) INBRED (SERVENTINA)	3.78701414178135
Ames23417:81FE8ABXX:5:250032420	A305	4.57237929395649
Ames23423:81FE8ABXX:5:250032440	A334	2.20833333333333
Ames23426:81FE8ABXX:5:250032399	A357	1.39933885502114
Ames23430:81FE8ABXX:6:250032597	A401	3.04166666666667
Ames23449:81FE8ABXX:6:250032536	A548	2.04166666666667
Ames23456:81N4HABXX:5:250033425	A617	2.5723792939565
PI587139:81N4HABXX:6:250033566	A619	2.57074360790409
Ames23458:81N4HABXX:2:250033051	A619HT	2.91666666666666
Ames23461:81FE8ABXX:6:250032595	A625	2.70833333333333
Ames23463:81FE8ABXX:5:250032436	A627	4.25218170675091
Ames23464:81FE8ABXX:6:250032533	A628	3.75
PI587140:81FE8ABXX:1:250031900	A632	4.04166666666666
Ames23468:81FE8ABXX:6:250032510	A632HT	4.53070125088427
Ames23469:81FE8ABXX:1:250031880	A632HTN	4.90407694123743
Ames23470:81N4HABXX:6:250033601	A632RPRP	4.15407694123743
Ames19308:81N4HABXX:4:250033343	A634	4.29166666666666
Ames19309:81FE7ABXX:4:250031394	A635	4.10218170675091
Ames23474:81FE8ABXX:5:250032426	A636	2.91206364674738
Ames23478:81FE8ABXX:6:250032592	A643	1.9292563920959
Ames23479:81FE8ABXX:5:250032422	A644	2.02237929395649
Ames23480:81FE8ABXX:5:250032452	A645	3.83333333333333
Ames23488:81FE8ABXX:6:250032572	A656	2.77237929395649
NSL81599:81FENABXX:7:250034628	A659	3.54166666666666
NSL81600:81FENABXX:3:250034831	A660	1.67237929395649
PI607523:81FE8ABXX:6:250032539	A663	2.91666666666667
PI607524:81FE8ABXX:3:250032195	A664	4.37499999999999
Ames23494:81FENABXX:3:250034838	A670	5.90407694123743
Ames23495:81FENABXX:7:250034605	A671	2.65218170675091
Ames23502:81FE8ABXX:6:250032598	A678	2.20218170675091
Ames23503:81FE7ABXX:6:250031669	A680	2.20833333333333
PI567794:81FE8ABXX:6:250032526	A686SU	3.33333333333333
Ab18:81FENABXX:5:250035064	AB18	0.987410274570758
Ames22792:81FENABXX:3:250034854	ABPL 2	1.52237929395649
Ames28974:81FE7ABXX:5:250031546	AD 104 DS	0.987410274570757
Ames28990:81FENABXX:5:250035123	AD 11 DS	3.82074360790409
Ames28981:81N4HABXX:7:250033657	AD 157 DS	4.73741027457076
Ames28985:81FENABXX:5:250035059	AD 188L	2.98741027457076
Ames28994:81FENABXX:4:250034931	AD 188L DS	3.32074360790409
Ames28995:81FE7ABXX:3:250031298	AD 221	3.82074360790409
Ames28987:81FENABXX:4:250035015	AD 233	4.3207436079041
Ames28988:81FENABXX:5:250035097	AD 26 DS	2.91206364674738
Ames28984:81FE7ABXX:3:250031266	AD 284	3.82074360790409
Ames28977:81FENABXX:2:250034683	AD 316 DS	3.53706364674738
Ames28991:81FE7ABXX:2:250031202	AD 330	3.65407694123743
Ames28996:81FE7ABXX:1:250030986	AD 347 DS-1	3.16206364674738
Ames28980:81FENABXX:2:250034716	AD 352	5.32074360790409
Ames28992:81FENABXX:4:250034972	AD 363-1	3.03706364674738
Ames29030:81N4HABXX:7:250033707	AD 370	2.78706364674738
Ames28986:81FENABXX:3:250034820	AD 402 DS	1.38820254014956
Ames28999:81FENABXX:1:250033777	AD 440 DS-1	2.57074360790409
Ames28989:81FE7ABXX:1:250031007	AD H10	3.88820254014957
Ames29010:81FENABXX:1:250033808	AD SA10	2.40407694123743
Ames29011:81FE7ABXX:5:250031506	AD SA11	1.32074360790409
Ames29012:81FENABXX:1:250033827	AD SA12	0.987410274570758
Ames29013:81N4HABXX:6:250033604	AD SA13	3.13820254014957
Ames29014:81FE7ABXX:5:250031528	AD SA14	2.16206364674738
Ames29015:81N4HABXX:6:250033606	AD SA15	1.03706364674738
Ames29016:81N4HABXX:7:250033715	AD SA16	1.03706364674738
Ames29017:81FE7ABXX:5:250031561	AD SA17	1.03706364674738
Ames29018:81FE7ABXX:5:250031543	AD SA18	1.03706364674738
Ames29019:81FE7ABXX:4:250031448	AD SA19	1.65407694123742
Ames29002:81FE7ABXX:4:250031421	AD SA2	2.01315303518354
Ames29020:81FE7ABXX:3:250031295	AD SA20	1.98741027457076
Ames29021:81FE7ABXX:4:250031368	AD SA21	1.03706364674738
Ames29003:81FE7ABXX:6:250031705	AD SA3	2.15407694123743
Ames29004:81FENABXX:2:250034706	AD SA4	2.40407694123743
Ames29005:81FE7ABXX:5:250031510	AD SA5	1.90407694123742
Ames29007:81N4HABXX:7:250033698	AD SA7	1.53706364674738
Ames29008:81FENABXX:2:250034712	AD SA8	0.987410274570758
Ames29009:81FENABXX:1:250033795	AD SA9	1.57074360790409
Ames29022:81FE7ABXX:6:250031706	AD SG1501	1.73741027457076
NSL437910:81FENABXX:4:250034992	AUSTRCF 305836	1.04399292910932
NSL437933:81FENABXX:4:250034963	AUSTRCF 306238	2.33333333333333
NSL437934:81FENABXX:5:250035138	AUSTRCF 306239	1
NSL437962:81FE7ABXX:1:250030995	AUSTRCF 306276	1.29166666666667
NSL437992:81FENABXX:6:250035203	AUSTRCF 306306	3.45833333333333
NSL438019:81FENABXX:3:250034807	AUSTRCF 306333	3.09320125088427
NSL438022:81FE7ABXX:2:250031166	AUSTRCF 306336	1.62237929395649
NSL438034:81FENABXX:4:250034958	AUSTRCF 306348	3.45218170675092
NSL438036:81FE7ABXX:1:250031071	AUSTRCF 306350	4.75218170675092
PI340841:81FE7ABXX:2:250031170	B-15 DENT STERILE	3.65407694123743
PI340860:81N4HABXX:7:250033699	B-28	2.90407694123743
PI340838:81FE7ABXX:1:250031016	B-4541	2.28706364674738
PI340839:81FE7ABXX:2:250031139	B-WHO-201	2.66201414178136
PI584529:81FENABXX:6:250035176	B100	0.999999999999999
PI594045:81FENABXX:2:250034759	B102	1.03706364674738
PI594048:81FENABXX:3:250034886	B105	1.85218170675091
PI594049:81FE7ABXX:2:250031130	B106	1.125
PI597925:81FE7ABXX:3:250031325	B107	1.02237929395649
PI597926:81FE7ABXX:1:250031033	B108	4.79399292910932
PI597927:81FE7ABXX:1:250030983	B109	1.72237929395649
PI607382:81FENABXX:4:250035011	B111	2.57074360790409
PI607383:81FE7ABXX:3:250031320	B113	1.48741027457076
PI607384:81FE7ABXX:2:250031128	B114	0.987410274570757
PI632746:81FE7ABXX:1:250031010	B116	0.999999999999998
NSL65866:81FE7ABXX:5:250031578	B14	2.90407694123743
PI550461:81FE7ABXX:5:250031584	B14A	3.02819911686267
Ames27066:81FE8ABXX:7:250032840	B164	2.10218170675091
PI550467:81FE7ABXX:1:250030985	B37	1.28070125088426
NSL30046:81FENABXX:5:250035132	B41	1.70833333333333
PI550469:81FE7ABXX:1:250030991	B46	2.48149292910932
PI601009:81FE8ABXX:1:250031950	B47	1.125
PI608764:81FENABXX:4:250034944	B55	1.65407694123742
PI550472:81FENABXX:4:250034982	B57	2.40218170675091
PI550462:81FE7ABXX:5:250031535	B59	3.73741027457076
PI550455:81FENABXX:5:250035053	B67	2.04166666666667
NSL65863:81FENABXX:1:250033778	B7	1.26258972542923
PI550466:81FE7ABXX:3:250031293	B70	1.98741027457076
PI550473:81FE7ABXX:6:250031665	B73	2.23741027457076
Ames8397:81FE7ABXX:5:250031568	B73HT	1.97237929395649
Ames27065:81FE7ABXX:5:250031573	B73HTRHM	1.98741027457076
PI608774:81N4HABXX:6:250033616	B75	1.04166666666667
PI550483:81FE7ABXX:5:250031544	B76	1.40218170675091
PI608765:81N4HABXX:7:250033664	B77	2.5
PI608766:81FE7ABXX:6:250031646	B79	2.20833333333333
PI608777:81FE7ABXX:3:250031255	B85	1.52237929395649
PI608768:81FENABXX:3:250034848	B87	4.79166666666666
PI550556:81FENABXX:4:250035005	B88	1.55592348240823
PI509542:81FENABXX:5:250035130	B89	1.53706364674738
PI527700:81FE7ABXX:1:250031003	B91	1.41666666666667
PI539870:81FE8ABXX:1:250031917	B92	1.07074360790409
PI539871:81FE8ABXX:6:250032542	B93	1.03706364674738
PI539872:81FENABXX:5:250035092	B94	2.8207436079041
PI564682:81FENABXX:1:250033788	B97	1.41666666666667
PI584528:81FE7ABXX:6:250031647	B99	1.48741027457076
Ames2332:81FE7ABXX:4:250031367	BEI 10 = NORTH 10	1.65570125088427
Ames19284:81FE8ABXX:7:250032795	C103	0.961554049598674
Ames19313:81N4HABXX:6:250033580	C123	1.01258972542923
PI221820:81FE7ABXX:6:250031661	C410-1(F11) INBRED (HOTNOT CROSSES)	2.57237929395649
Ames22441:81FE8ABXX:4:250032253	CH157	3
Ames27017:81FENABXX:3:250034866	CH705-8	3.20833333333333
Ames27018:81N4HABXX:5:250033460	CH711-10	2.4723792939565
Ames27019:81FE8ABXX:5:250032438	CH732-12	3.79166666666666
Ames27020:81FE8ABXX:6:250032550	CH741-6	3.45833333333333
PI391660:81FE7ABXX:5:250031559	CHI-41	2.04166666666667
Ames26120:81FENABXX:3:250034828	CI 20	1.9223792939565
Ames26132:81FE7ABXX:2:250031125	CI 72	1.37871040839286
Ames26134:81FENABXX:4:250034953	CI 75	1.25
CIze45:81FENABXX:3:250034850	CI45	1
Ames22440:81FE7ABXX:1:250030998	CI90C	1.1723792939565
CML116:81FE7ABXX:6:250031673	CML116	3.16206364674738
CML211:81FE7ABXX:5:250031534	CML211	4.90407694123743
CML326:81FE7ABXX:7:250031780	CML326	3.03706364674738
CML365:81N4HABXX:3:250033164	CML365	0.987410274570759
CML456:81N4HABXX:3:250033142	CML456	3.98741027457076
Ames27051:81FE8ABXX:4:250032283	CO256	2.30218170675091
Ames27053:81FE8ABXX:4:250032316	CO258	1.45833333333333
PI606329:81FE7ABXX:2:250031148	DE1	1.70833333333333
PI638552:81FE7ABXX:1:250031002	DE4	1.40407694123743
PI550558:81FE7ABXX:5:250031524	DE811	2.57820082112916
PI601191:81FE7ABXX:6:250031638	DJ7	1.48741027457076
PI221747:81FE8ABXX:7:250032768	E205-1-1-1 INBRED (S5 SYN. ANVELD)	1.75218170675091
PI601724:81FENABXX:2:250034748	E8501	2.75218170675091
Ames2330:81N4HABXX:6:250033592	EAST 028	1.6223792939565
PI427109:81N4HABXX:6:250033593	ENG-LI CHIH	1.16666666666667
Ames27112:81N4HABXX:2:250033030	F2834T	1.33333333333333
PI257516:81FENABXX:6:250035244	F39	4.57237929395649
PI600958:81FE7ABXX:4:250031412	FAPW	1.75
PI601439:81FE7ABXX:2:250031195	FBHJ	2.00218170675091
PI600772:81FENABXX:4:250034966	FR19	4.00218170675091
PI601037:81FE7ABXX:6:250031660	G80	1
GA220:81FE8ABXX:4:250032266	GA220	4.23741027457076
Ames10254:81N4HABXX:3:250033198	GE54	1.33333333333334
PI511313:81FE7ABXX:7:250031752	GT113	2.91666666666667
PI511318:81FE7ABXX:7:250031754	GT119	1.8223792939565
Ames22748:81FE7ABXX:3:250031306	H100	3.58333333333333
PI550497:81FE7ABXX:4:250031369	H103	3.33333333333333
Ames22749:81N4HABXX:7:250033672	H104W	2.03706364674738
PI587127:81FE7ABXX:5:250031574	H105W	3.5223792939565
Ames26800:81FE7ABXX:5:250031557	H106W	1.29166666666667
Ames19318:81FE7ABXX:4:250031436	H107	0.987410274570762
Ames26801:81FENABXX:1:250033801	H108	1
Ames26802:81FENABXX:1:250033803	H109	0.987410274570762
PI550527:81N4HABXX:4:250033357	H111	0.987410274570763
Ames22750:81N4HABXX:6:250033560	H112	0.987410274570762
Ames26803:81N4HABXX:7:250033724	H113	1.45833333333333
Ames22751:81N4HABXX:7:250033739	H114	1.53706364674738
Ames26804:81FE7ABXX:5:250031495	H121	1.05218170675091
Ames22753:81FE7ABXX:5:250031531	H123	2.91206364674738
PI583846:81FENABXX:5:250035070	H126W	1.04166666666667
Ames26785:81FENABXX:1:250033820	H45	1.75
Ames15929:81FENABXX:1:250033855	H49	1.00218170675091
Ames26794:81FENABXX:2:250034719	H73	1.16206364674738
PI587128:81FE7ABXX:4:250031400	H84	1.53070125088427
PI601610:81FE7ABXX:3:250031302	H8431	3.1723792939565
Ames26796:81FE7ABXX:4:250031437	H93	1.3207436079041
Ames19319:81FE7ABXX:6:250031680	H95	1.875
Ames26798:81FE7ABXX:3:250031326	H98	1.5
PI587129:81FENABXX:2:250034734	H99	1.33333333333334
PI601564:81FE8ABXX:5:250032383	HB8229	3.05218170675092
PI601172:81FENABXX:5:250035080	HBA1	2.625
PI587131:81FENABXX:4:250034929	HP301	2.125
PI542776:81FENABXX:4:250034949	HP62-02	1.23741027457076
NSL30864:81FENABXX:2:250034698	HY2	1.51258972542923
I205:MRG:2:250040145	I205	1.95574865719907
Ames27115:81N4HABXX:5:250033453	I29	2.75
NSL75971:81FE7ABXX:6:250031664	IA 61	2.57871040839286
Ames22025:81FENABXX:1:250033800	IA CG4189	2.41281504933096
PI340875:81FE8ABXX:7:250032841	IA DS 43-W	1.41206364674738
PI340876:81FE7ABXX:2:250031167	IA DS 53	3.65218170675092
NSL75976:81FENABXX:4:250035004	IA DS 61	1.98741027457076
NSL75977:81FENABXX:2:250034755	IA DS 62	2.8207436079041
Ames22030:81N4HABXX:6:250033617	IA453	4.20833333333333
PI601208:81FE8ABXX:5:250032429	IB014	3.3207436079041
PI601565:81FE7ABXX:4:250031391	IBB14	2.29166666666667
PI601458:81FE8ABXX:1:250031890	IBB15	1.23741027457076
PI601459:81FE8ABXX:6:250032594	IBC2	1.0707436079041
Ames24575:81FE7ABXX:1:250031070	IDS28	2.59320125088427
Ames24576:81FENABXX:4:250035010	IDS69	2.20833333333333
Ames24577:81FENABXX:4:250034969	IDS91	2.10218170675092
Ames27120:81FE7ABXX:7:250031769	IL677A	0.935924753345196
Ames27446:81N4HABXX:7:250033730	IL778D	1
PI186227:81FE8ABXX:1:250031901	INBRED 309	5.16666666666666
PI186218:81FENABXX:1:250033797	INBRED 34-1141	6.91666666666666
PI601725:81N4HABXX:6:250033600	J8606	2.5
Ames27122:81FE8ABXX:7:250032762	K148	1.45833333333334
NSL22630:81FENABXX:6:250035258	K150	3.91666666666667
Ames22754:81FE7ABXX:5:250031565	K55	1
NSL30863:81FE7ABXX:1:250031011	L	2.70833333333333
NSL65873:81FE8ABXX:7:250032823	L317	1.90407694123743
PI644101:81FE7ABXX:2:250031192	LH1	2.51258972542924
PI600954:81N4HABXX:5:250033455	LH119	1.91666666666667
PI601079:81FE7ABXX:4:250031456	LH123HT	2.29166666666667
PI538007:81FE8ABXX:7:250032771	LH127	3.00218170675092
PI547086-1:81FENABXX:7:250034631	LH128	1
PI601004:81N4HABXX:6:250033532	LH132	2.55218170675092
PI539922:81FE7ABXX:4:250031430	LH190	2.73741027457076
PI539926:81N4HABXX:6:250033572	LH192	1.4723792939565
PI539927:81FE7ABXX:4:250031434	LH193	1.875
PI539923:81FENABXX:2:250034739	LH194	1.65407694123743
PI537097:81FENABXX:1:250033872	LH195	0.987410274570762
PI538009:81FENABXX:1:250033869	LH196	2.53706364674738
PI537099:81FE7ABXX:4:250031441	LH205	1.875
PI547088-1:81FENABXX:7:250034564	LH208	2.0223792939565
PI538011:81FE7ABXX:4:250031414	LH220HT	4.04166666666667
PI600791:81N4HABXX:5:250033467	LH38	2.04166666666667
PI600944:81N4HABXX:1:250032906	LH39	3.2723792939565
PI600955:81FE7ABXX:4:250031416	LH51	1
PI601317:81FENABXX:1:250033829	LH57	1
PI601466:81FE8ABXX:3:250032185	LH59	1
PI601404:81N4HABXX:1:250032892	LH60	1
PI601494:81N4HABXX:6:250033535	LH65	0.987410274570764
PI600957:81FE8ABXX:5:250032450	LH74	1.5
PI601170:81FE8ABXX:6:250032540	LH82	3.20833333333333
PI601171:81N4HABXX:7:250033705	LH93	1.45833333333334
PI600755:81FENABXX:2:250034718	LP1 CMS HT	3.91206364674738
PI600729:81FE7ABXX:4:250031458	LP1 NR HT	3.01315303518354
NSL30867:81FE8ABXX:1:250031956	M14	1.16666666666667
PI601209:81FE7ABXX:4:250031398	MBNA	2.15407694123743
PI601440:81FENABXX:1:250033864	MBPM	1
PI601566:81FE7ABXX:3:250031261	MBST	1.45833333333334
PI600956:81FE7ABXX:5:250031548	MDF-13D	1.00218170675092
Ames26004:81N4HABXX:5:250033478	MINN #5	3.48741027457077
PI583774:81FENABXX:3:250034846	ML606	3.53706364674738
PI558518:81N4HABXX:1:250032900	MO15W	1.125
PI558532:81FE7ABXX:4:250031418	MO17	1
PI558520:81FE8ABXX:7:250032816	MO1W	1
Ames28361:81FE7ABXX:1:250031072	MO402	1.625
Ames20120:81FE7ABXX:2:250031157	MO42	2
PI583350:81FE7ABXX:4:250031424	MO45	2.85218170675092
PI583351:81FE7ABXX:5:250031560	MO46	1.16666666666667
PI583352:81N4HABXX:7:250033675	MO47	4.41666666666667
PI634206:81FENABXX:2:250034710	MO48	3.66666666666667
PI634207:81FE7ABXX:5:250031551	MO49	3.4723792939565
Ames28947:81FENABXX:5:250035142	MO512BW	2.70833333333333
Ames22442:81FE8ABXX:6:250032551	MS100	4.2223792939565
Ames24729:81N4HABXX:6:250033552	MS116	1.2723792939565
Ames24730:81N4HABXX:3:250033197	MS132	2.54241667944397
Ames24737:81FE8ABXX:5:250032445	MS200	2.5223792939565
Ames24739:81N4HABXX:6:250033603	MS203	2.41666666666667
Ames24742:81FE8ABXX:5:250032447	MS211	2.45833333333333
Ames24743:81FE8ABXX:6:250032553	MS214	1.125
Ames24744:81FENABXX:4:250034928	MS215	1.29166666666667
Ames24746:81FENABXX:7:250034629	MS221	1.83333333333334
Ames24748:81FE8ABXX:6:250032522	MS223	1.53070125088427
Ames24749:81FENABXX:3:250034839	MS224	1.05218170675092
Ames24751:81FE8ABXX:5:250032432	MS226	3.16666666666667
Ames24707:81FENABXX:2:250034758	MS24	4.04166666666667
Ames24709:81FE8ABXX:6:250032528	MS57	1.0723792939565
Ames24711:81FE8ABXX:6:250032545	MS68	2.15407694123743
Ames24712:81N4HABXX:6:250033531	MS71	1.13820254014957
Ames24713:81FENABXX:3:250034804	MS72	3.5
Ames24717:81FE8ABXX:6:250032544	MS77	2.79166666666667
Ames24720:81FE8ABXX:4:250032290	MS80	1.4223792939565
Ames24721:81FENABXX:3:250034871	MS81	2.29166666666667
PI550566:81N4HABXX:6:250033594	N192	3.79166666666667
PI568158:81N4HABXX:7:250033741	N199	1.29166666666667
PI568159:81FE8ABXX:5:250032406	N200	1.20218170675092
PI595366:81FENABXX:3:250034822	N209	2.38820254014957
PI596355:81FE8ABXX:5:250032414	N216	2.89374594510235
PI596356:81FE8ABXX:5:250032396	N217	3.91206364674738
Ames27138:81FE7ABXX:5:250031505	N28HT	3.71281504933096
PI594050:81N4HABXX:6:250033561	N501	1.5
PI594051:81FE8ABXX:1:250031945	N502	3.3223792939565
PI594052:81FE8ABXX:1:250031902	N503	4.20833333333333
PI594054:81FE8ABXX:4:250032289	N505	3.3223792939565
PI594058:81N4HABXX:2:250033045	N509	1.70833333333333
PI594062:81N4HABXX:6:250033525	N513	1.16666666666667
PI594065:81FE8ABXX:1:250031946	N516	1.5
PI594070:81N4HABXX:6:250033578	N521	2.0723792939565
PI594071:81FE8ABXX:1:250031914	N523	1.16666666666667
PI594072:81FE8ABXX:1:250031957	N524	1.00218170675092
PI594076:81N4HABXX:6:250033586	N529	2.16206364674738
PI594077:81FE8ABXX:1:250031893	N530	2.3723792939565
PI594078:81FE8ABXX:1:250031940	N532	1.78706364674738
PI594079:81FE8ABXX:4:250032321	N533	2.67235949197009
PI594080:81FE8ABXX:1:250031961	N534	2.88810353021752
PI594089:81FE8ABXX:1:250031921	N543	2.5
PI597578:81N4HABXX:6:250033591	N546	1.4723792939565
PI638549:81N4HABXX:6:250033574	N551	1
PI638550:81FE8ABXX:5:250032446	N552	1.00218170675092
Ames27137:81N4HABXX:7:250033666	N6	1.66666666666667
PI221743:81FE8ABXX:6:250032602	N72-3-1-1 INBRED	1.7223792939565
PI607512:81FENABXX:2:250034717	N7A	2.41666666666667
PI592741:81FENABXX:1:250033859	N801W	1.0223792939565
Ames12732:81N4HABXX:1:250032896	NC232	2.95833333333333
PI550555:81FENABXX:1:250033796	NC250	1.04166666666667
PI511309:81FENABXX:1:250033819	NC252	2.23741027457076
PI511310:81FE7ABXX:3:250031269	NC254	1.3207436079041
PI511311:81FENABXX:2:250034705	NC256	1.41206364674739
Ames27140:81FENABXX:4:250034930	NC260	1.2223792939565
PI531085:81FENABXX:2:250034667	NC262	1
Ames28412:81FE7ABXX:6:250031628	NC262A	0.987410274570766
Ames28417:81FE7ABXX:2:250031131	NC270	0.987410274570765
Ames28419:81FENABXX:4:250034961	NC278	1.00218170675092
Ames28420:81FE7ABXX:3:250031283	NC278A	0.987410274570766
Ames28421:81FE7ABXX:1:250030990	NC280	2.40407694123743
Ames28422:81FENABXX:3:250034799	NC282	1.3207436079041
Ames28423:81FE7ABXX:2:250031111	NC284	2.41206364674738
Ames28425:81FENABXX:3:250034861	NC288	0.888103530217521
Ames28426:81FENABXX:5:250035125	NC290	0.987410274570767
Ames27141:81FE7ABXX:3:250031331	NC290A	1.0223792939565
Ames27142:81FENABXX:1:250033784	NC292	1.41666666666667
Ames27147:81N4HABXX:2:250033039	NC302	1.142169695437
Ames27150:81FE7ABXX:2:250031126	NC308	1.15570125088427
Ames27151:81FENABXX:4:250034926	NC310	1.83333333333333
Ames27160:81FE7ABXX:3:250031274	NC328	1.20218170675092
Ames27161:81FE7ABXX:3:250031303	NC330	1.0223792939565
Ames27167:81FE7ABXX:1:250031050	NC342	1.10218170675092
Ames27168:81FE7ABXX:6:250031622	NC344	1.00218170675092
Ames27178:81N4HABXX:7:250033696	NC364	1
Ames27182:81FE7ABXX:5:250031570	NC372	1.85218170675092
PI607527:81FE8ABXX:4:250032264	ND300	1.4223792939565
NSL32736:81FENABXX:6:250035212	ND480	3.91666666666667
PI303929:81FE8ABXX:7:250032848	NO. 1037 INBRED	1.29166666666667
PI303930:81FE7ABXX:3:250031319	NO. 1049 INBRED	3.85218170675092
PI303932:81FE8ABXX:1:250031932	NO. 1068 INBRED	5
PI303933:81FE8ABXX:6:250032531	NO. 1070 INBRED	3.15218170675092
PI303940:81FE7ABXX:3:250031280	NO. 1201 INBRED	4.14933885502115
PI303941:81FE7ABXX:6:250031697	NO. 1266 INBRED	2.70833333333333
PI542715:81FE8ABXX:1:250031926	NP86	4.41206364674739
PI542716:81N4HABXX:5:250033423	NP87	1.78706364674739
PI601417:81FE7ABXX:5:250031507	NS701	2.29166666666667
PI200189:81FE8ABXX:6:250032514	NY 428 (NEVEH YAAR)	2.125
PI610494:81FENABXX:1:250033842	NY6371	4.29166666666667
PI561695:81FENABXX:2:250034735	NYLB31	2.2723792939565
PI561694:81FE8ABXX:6:250032563	NYRD4058	1.00218170675092
PI553063:81FE7ABXX:4:250031393	OC10	1.79166666666667
PI596499:81FE7ABXX:4:250031409	OC12	2.75
PI596501:81FE7ABXX:3:250031262	OC14	1.40218170675092
PI596502:81FE7ABXX:5:250031493	OC15	1.34592305876256
PI596503:81FENABXX:2:250034676	OC16	2.91281504933097
PI553056:81FE7ABXX:3:250031329	OC3	1.0223792939565
PI553058:81FE7ABXX:5:250031569	OC5	4.05218170675091
PI553060:81N4HABXX:7:250033673	OC7	4.75
PI553061:81FE7ABXX:4:250031406	OC8	2.71566060912601
NSL28965:81FE7ABXX:5:250031552	OH33	2.71820125088427
NSL28966:81N4HABXX:6:250033589	OH40B	1.5
NSL68211:81N4HABXX:6:250033607	OH422	1.15218170675092
Ames19288:81FE8ABXX:5:250032389	OH43	2.75218170675092
NSL28967:81N4HABXX:5:250033491	OH56A	2.16666666666667
PI573098:81N4HABXX:6:250033558	OH603	1.15407694123744
NSL28968:81FENABXX:7:250034567	OH84	1.79241667944397
NSL65874:81N4HABXX:6:250033613	OS420	1.80218170675092
Ames22756:81FE8ABXX:1:250031925	OS426	2.1223792939565
Ames22048:81FENABXX:3:250034795	P39M96	1.89933885502115
Ames22049:81FE7ABXX:4:250031435	P51	3.58333333333333
PI644102:81FE8ABXX:6:250032527	P737M20	2.3723792939565
PI531081:81FENABXX:2:250034682	PA356	3.5
PI531082:81FENABXX:3:250034797	PA376	1.66666666666667
Ames22757:81N4HABXX:6:250033587	PA405	1.20833333333334
PI517971:81N4HABXX:1:250032940	PA468	3.08333333333333
PI560074:81FE7ABXX:5:250031492	PA759	2.91206364674738
PI560075:81N4HABXX:7:250033668	PA760	1.88820254014957
Ames27184:81FE7ABXX:5:250031512	PA762	2.625
PI560081:81FENABXX:1:250033791	PA778	2.04399292910932
Ames19324:81FE7ABXX:2:250031199	PA871	1.79166666666667
Ames27185:81FE7ABXX:5:250031571	PA875	1
PI517972:81FE7ABXX:2:250031155	PA877	1.00218170675092
PI587147:81FE7ABXX:1:250031030	PA91	1.20218170675092
PI601441:81FE7ABXX:1:250031013	PB80	1.5707436079041
PHB47:C00R8ABXX:2:250007187	PHB47	1.01258972542923
PI601270:81FENABXX:1:250033857	PHG29	0.987410274570768
PI601008-1:81FENABXX:7:250034598	PHG35	1.1723792939565
PI600981:81FENABXX:1:250033863	PHG39	1.3207436079041
PI601006:81FE7ABXX:5:250031516	PHG50	1.01874594510235
PI601150:81FE8ABXX:5:250032418	PHG71	2.55218170675092
PI601229:81FE7ABXX:5:250031564	PHG83	1
PI601320:81FENABXX:4:250034941	PHG84	1.5707436079041
PI601442:81FENABXX:4:250034937	PHG86	2.25
PI601567:81FE7ABXX:4:250031452	PHH93	1.8207436079041
PI601773:81FE7ABXX:5:250031508	PHJ31	1.16666666666667
PI601774:81N4HABXX:5:250033402	PHJ33	1.125
PI601775:81FENABXX:1:250033835	PHJ70	2.41666666666667
PI601468:81FENABXX:2:250034700	PHK29	1
PI601777:81FE8ABXX:1:250031875	PHK35	1
PI601495:81FENABXX:1:250033811	PHK42	3.1723792939565
PI601778:81FENABXX:3:250034821	PHM10	1.45833333333333
PI601568:81FE7ABXX:2:250031201	PHM49	2.35218170675092
PI601497:81FE7ABXX:1:250030994	PHN11	1.91206364674739
PI601780:81FE8ABXX:1:250031918	PHN29	4.125
PI601782:81N4HABXX:5:250033466	PHN73	2.8723792939565
PI601783:81FE7ABXX:6:250031695	PHN82	1.73741027457077
PI601570:81FE8ABXX:5:250032468	PHP02	2.40407694123743
PI601784:81FE8ABXX:1:250031952	PHP55	2.23741027457076
PI601361:81FENABXX:6:250035224	PHR36	1.25218170675092
PI601572:81FENABXX:1:250033785	PHR47	2.08333333333333
PI601786:81FE7ABXX:4:250031411	PHR62	1.125
PI601573:81FENABXX:6:250035223	PHT10	1.54166666666667
PI601788:81FE7ABXX:2:250031142	PHT22	2.9723792939565
PI601498:81FENABXX:1:250033853	PHT55	1.03706364674739
PI601574:81FENABXX:4:250035000	PHT60	1.16666666666667
PI601499:81FE7ABXX:2:250031159	PHT77	1.58333333333333
PI601470:81FE8ABXX:1:250031962	PHV78	1.125
PI601362:81FE7ABXX:3:250031285	PHW17	1
PI601791:81FENABXX:4:250034985	PHW20	2.4723792939565
PI601792:81FENABXX:5:250035083	PHW43	2.5707436079041
PI601575:81FENABXX:5:250035073	PHW52	2.20218170675092
PI601501:81FE7ABXX:3:250031271	PHW65	1.29166666666667
PI601576:81FE7ABXX:3:250031247	PHW79	1
PI601322-1:81FENABXX:7:250034578	PHZ51	1.625
PI601190:81FE8ABXX:5:250032427	Q381	1.6723792939565
NSL30878:81FE7ABXX:4:250031427	R101	4.25
NSL30879:81FENABXX:1:250033849	R103	2.15570125088427
NSL242484:81FENABXX:1:250033779	R109B	1.72685841717682
NSL30883:81FENABXX:2:250034677	R113	1.04166666666667
NSL30888:81FE7ABXX:5:250031572	R154	1.96820125088427
NSL30890:81N4HABXX:7:250033678	R159	2.36842348240823
Ames19326:81N4HABXX:5:250033412	R168	1.125
NSL30894:81FE7ABXX:4:250031446	R177	1.33333333333334
NSL30896:81FENABXX:1:250033826	R181B	5.5
NSL30898:81FE7ABXX:4:250031405	R192	1.51258972542923
NSL30902:81FE7ABXX:3:250031243	R197	3.70833333333333
NSL30865:81FENABXX:2:250034744	R2	3.66666666666667
NSL29317:81FE8ABXX:1:250031882	R221	2
Ames27187:81FENABXX:5:250035087	R4	1.28070125088427
NSL30872:81FENABXX:1:250033847	R71	3.95833333333333
NSL30876:81FENABXX:1:250033813	R78	1.41666666666667
NSL117226:81FE7ABXX:4:250031402	R802A	1.03706364674739
NSL30907:81FENABXX:2:250034756	R906	2.45833333333333
NSL30908:81N4HABXX:7:250033684	R907	3.26258972542924
PI340846:81FE7ABXX:6:250031707	RB-15 DENT STERILE	4.03706364674738
PI369442:81FENABXX:6:250035263	S 48	2.0723792939565
PI601612:81FE7ABXX:4:250031380	S8326	1.83333333333333
Ames27188:81FE7ABXX:2:250031181	SA24	1.875
NSL30835:81FENABXX:2:250034702	SD10	4.16206364674738
PI533659:81N4HABXX:4:250033273	SD102	1.375
PI606768:81FENABXX:3:250034808	SD40	1.00218170675092
PI606769:81FE8ABXX:5:250032407	SD41	2.75
PI508277:81FENABXX:3:250034860	SD42	1.3723792939565
PI524969:81FENABXX:2:250034681	SD44	2.28706364674738
PI524970:81FE8ABXX:5:250032455	SD46	1
PI538237:81FE8ABXX:4:250032330	SD63	1.54166666666667
PI600751:81N4HABXX:7:250033671	SEAGULL SEVENTEEN	1.01315303518355
NSL75980:81FE7ABXX:6:250031657	SG 30A	3.28706364674738
Sg1533:MRG:2:250040200	SG18	1.20218170675092
PI358521:81FENABXX:5:250035085	STRAIN 11D-586-68(A)	1.89933885502115
PI358530:81FE7ABXX:4:250031432	STRAIN 465A-421-68(B)	1.84592305876257
PI358534:81FENABXX:2:250034713	STRAIN T20-2-68(B)	2.39933885502115
PI391663:81N4HABXX:1:250032921	T IEH 84	5.2223792939565
PI340827:81FENABXX:7:250034560	T141	2.23741027457076
PI550521:81FE8ABXX:7:250032854	T226	1.90407694123743
PI550522:81FE8ABXX:7:250032844	T232	1.41206364674739
PI340830:81FENABXX:2:250034707	T242	3.625
PI509045:81N4HABXX:2:250033023	T62S	2.30218170675092
PI550518:81FE8ABXX:7:250032792	T8	1.00218170675092
PI267171:81FENABXX:6:250035250	T8445 INBRED	1.58333333333333
Ames26022:81FENABXX:1:250033814	TR	1.90218170675092
Tx204:81FE8ABXX:7:250032767	TX204	1
Tx205:81N4HABXX:1:250032935	TX205	1.15218170675092
PI391678:81FE7ABXX:4:250031455	TZU-CHIAO-HSI-WU 105	3.75
PI587151:81FE8ABXX:1:250031935	VA102	1
Ames19001:81FENABXX:3:250034888	VA16	1.89933885502115
Ames19002:81N4HABXX:2:250033017	VA17	1
Ames19003:81N4HABXX:3:250033145	VA18A	1.6223792939565
Ames19328:81FE7ABXX:5:250031547	VA22	1
PI587149:81FE8ABXX:1:250031958	VA26	2.5
PI587150:81FE7ABXX:5:250031501	VA35	1.20218170675092
Ames19014:81N4HABXX:7:250033702	VA52	1.70833333333333
Ames19016:81FE7ABXX:3:250031305	VA59	1.0223792939565
Ames27193:81FE7ABXX:5:250031520	VA85	0.987410274570764
Ames19019:81FENABXX:1:250033836	VA91	2.41206364674738
Ames24989:81N4HABXX:7:250033695	VA99	2.85218170675092
Ames19000:81FE7ABXX:3:250031259	VAW6	3.28706364674738
Ames22052:81FE8ABXX:4:250032312	W 3607	1.875
Ames22053:81FENABXX:3:250034856	W 3647	1.7723792939565
Ames22060:81FENABXX:7:250034542	W 6462	2.27433885502115
NSL30053:81FE7ABXX:6:250031621	W22	2.15570125088427
PI520772:81FENABXX:7:250034593	W572	2.8723792939565
NSL30058:81FENABXX:1:250033846	W64A	1.66666666666667
PI601502:81N4HABXX:6:250033565	W8304	1.75
WD456:81FE8ABXX:6:250032530	WD456	3.0707436079041
Ames19293:81FE7ABXX:5:250031532	WF9	1.25
PI601685:81FE7ABXX:4:250031428	WIL901	0.935924753345199
NSL30066:81FE8ABXX:5:250032454	WR3	3.45833333333333
Ames26742:81N4HABXX:7:250033733	WX33-16	1.83333333333333
Ames26745:81FENABXX:1:250033805	WXB6	3.1723792939565
Ames26747:81FE7ABXX:6:250031650	WXI198	3.35218170675092
Ames26750:81FE7ABXX:3:250031251	WXK44	0.994580654810226
PI391682:81N4HABXX:6:250033536	YE-CHI-HUNG	3.83333333333333
PI391665:81FE8ABXX:6:250032589	YING-55	3.9723792939565
Ames2333:81FE8ABXX:1:250031874	YONG 28	4.41666666666667
Z010E0002:628NVAAXX:6:250023405	Z010E0002	3.321655496
Z010E0006:628NVAAXX:7:250023456	Z010E0006	2.782474214
Z010E0007:628NVAAXX:7:250023468	Z010E0007	2.054579483
Z010E0009:628NVAAXX:6:250023382	Z010E0009	2.243292932
Z010E0010:628NVAAXX:6:250023394	Z010E0010	3.449430904
Z010E0011:628NVAAXX:6:250023406	Z010E0011	3.60579649
Z010E0012:628NVAAXX:6:250023418	Z010E0012	3.267737368
Z010E0013:628NVAAXX:7:250023445	Z010E0013	2.593760765
Z010E0015:628NVAAXX:7:250023469	Z010E0015	2.189374804
Z010E0016:628NVAAXX:7:250023481	Z010E0016	2.998146727
Z010E0018:628NVAAXX:6:250023395	Z010E0018	2.168441313
Z010E0019:628NVAAXX:6:250023407	Z010E0019	3.275727129
Z010E0020:627C3AAXX:4:250028696	Z010E0020	2.512883573
Z010E0021:628NVAAXX:7:250023446	Z010E0021	1.602721611
Z010E0022:628NVAAXX:7:250023458	Z010E0022	4.130427419
Z010E0025:628NVAAXX:6:250023384	Z010E0025	3.189831281
Z010E0026:628NVAAXX:6:250023396	Z010E0026	1.694354793
Z010E0027:628NVAAXX:6:250023408	Z010E0027	3.374378917
Z010E0028:627C3AAXX:4:250028720	Z010E0028	3.052064855
Z010E0029:628NVAAXX:7:250023447	Z010E0029	2.243292932
Z010E0032:628NVAAXX:7:250023483	Z010E0032	2.512883573
Z010E0033:627C3AAXX:4:250028672	Z010E0033	3.052064855
Z010E0034:627C3AAXX:4:250028645	Z010E0034	3.448197971
Z010E0035:628NVAAXX:6:250023409	Z010E0035	2.864405534
Z010E0037:628NVAAXX:7:250023448	Z010E0037	2.537536585
Z010E0038:628NVAAXX:7:250023460	Z010E0038	1.83890697
Z010E0039:628NVAAXX:7:250023472	Z010E0039	3.402532688
Z010E0040:628NVAAXX:7:250023484	Z010E0040	1.973702291
Z010E0041:628NVAAXX:6:250023386	Z010E0041	3.632745607
Z010E0042:628NVAAXX:6:250023398	Z010E0042	2.512883573
Z010E0043:627C3AAXX:4:250028653	Z010E0043	3.537328009
Z010E0044:628NVAAXX:6:250023422	Z010E0044	2.143233064
Z010E0046:628NVAAXX:7:250023461	Z010E0046	1.967725453
Z010E0047:628NVAAXX:7:250023473	Z010E0047	1.973702291
Z010E0048:628NVAAXX:7:250023485	Z010E0048	2.728556086
Z010E0049:628NVAAXX:6:250023387	Z010E0049	3.321655496
Z010E0050:628NVAAXX:6:250023399	Z010E0050	1.971816883
Z010E0051:628NVAAXX:6:250023411	Z010E0051	2.636188373
Z010E0052:628NVAAXX:6:250023423	Z010E0052	2.782474214
Z010E0053:628NVAAXX:7:250023450	Z010E0053	2.054579483
Z010E0054:627C3AAXX:4:250028680	Z010E0054	4.076509291
Z010E0056:627C3AAXX:4:250028685	Z010E0056	1.799346041
Z010E0057:628NVAAXX:6:250023388	Z010E0057	1.973702291
Z010E0058:628NVAAXX:6:250023400	Z010E0058	1.973702291
Z010E0059:628NVAAXX:6:250023412	Z010E0059	2.512883573
Z010E0060:628NVAAXX:6:250023424	Z010E0060	2.512883573
Z010E0061:628NVAAXX:7:250023451	Z010E0061	4.26522274
Z010E0062:628NVAAXX:7:250023463	Z010E0062	3.591246137
Z010E0063:628NVAAXX:7:250023475	Z010E0063	2.156364519
Z010E0064:628NVAAXX:7:250023487	Z010E0064	2.378088252
Z010E0065:628NVAAXX:6:250023389	Z010E0065	2.710007427
Z010E0067:628NVAAXX:6:250023413	Z010E0067	2.593760765
Z010E0068:628NVAAXX:6:250023425	Z010E0068	3.079102699
Z010E0069:628NVAAXX:7:250023452	Z010E0069	2.552750823
Z010E0071:628NVAAXX:7:250023476	Z010E0071	2.710007427
Z010E0072:628NVAAXX:7:250023488	Z010E0072	2.143233064
Z010E0073:628NVAAXX:6:250023390	Z010E0073	2.340912155
Z010E0074:628NVAAXX:6:250023402	Z010E0074	4.186388515
Z010E0075:628NVAAXX:6:250023414	Z010E0075	2.340912155
Z010E0076:628NVAAXX:6:250023426	Z010E0076	3.005283645
Z010E0077:628NVAAXX:7:250023453	Z010E0077	1.602721611
Z010E0078:628NVAAXX:7:250023465	Z010E0078	2.864405534
Z010E0080:628NVAAXX:7:250023489	Z010E0080	3.743474189
Z010E0081:628NVAAXX:6:250023391	Z010E0081	2.082545465
Z010E0082:628NVAAXX:6:250023403	Z010E0082	2.552750823
Z010E0083:628NVAAXX:6:250023415	Z010E0083	2.710007427
Z010E0085:628NVAAXX:7:250023454	Z010E0085	2.143233064
Z010E0086:628NVAAXX:7:250023466	Z010E0086	1.971816883
Z010E0088:628NVAAXX:7:250023490	Z010E0088	2.451640737
Z010E0089:628NVAAXX:6:250023404	Z010E0089	2.143233064
Z010E0090:628NVAAXX:6:250023416	Z010E0090	2.143233064
Z010E0091:633Y5AAXX:6:250028771	Z010E0091	3.374378917
Z010E0092:628NVAAXX:7:250023455	Z010E0092	3.449430904
Z010E0093:628NVAAXX:7:250023467	Z010E0093	3.079102699
Z010E0094:628NVAAXX:7:250023479	Z010E0094	3.374378917
Z010E0098:627C3AAXX:4:250028697	Z010E0098	2.864405534
Z010E0099:628DJAAXX:2:250023570	Z010E0099	2.710007427
Z010E0103:628DJAAXX:1:250023508	Z010E0103	1.971816883
Z010E0104:627C3AAXX:4:250028673	Z010E0104	2.636188373
Z010E0106:628DJAAXX:1:250023544	Z010E0106	2.710007427
Z010E0107:628DJAAXX:2:250023571	Z010E0107	2.267093101
Z010E0108:628DJAAXX:2:250023583	Z010E0108	2.451640737
Z010E0111:628DJAAXX:1:250023509	Z010E0111	2.710007427
Z010E0112:628DJAAXX:1:250023521	Z010E0112	2.267093101
Z010E0113:628DJAAXX:1:250023533	Z010E0113	2.820736009
Z010E0114:628DJAAXX:1:250023545	Z010E0114	2.340912155
Z010E0116:628DJAAXX:2:250023584	Z010E0116	3.189831281
Z010E0117:628DJAAXX:2:250023596	Z010E0117	2.820736009
Z010E0118:628DJAAXX:2:250023608	Z010E0118	1.971816883
Z010E0119:627C3AAXX:4:250028654	Z010E0119	2.082545465
Z010E0121:627C3AAXX:4:250028686	Z010E0121	2.340912155
Z010E0122:628DJAAXX:1:250023546	Z010E0122	2.451640737
Z010E0125:628DJAAXX:2:250023597	Z010E0125	2.340912155
Z010E0126:628DJAAXX:2:250023609	Z010E0126	2.636188373
Z010E0127:627C3AAXX:4:250028710	Z010E0127	3.374378917
Z010E0128:628DJAAXX:1:250023523	Z010E0128	2.820736009
Z010E0129:628DJAAXX:1:250023535	Z010E0129	2.820736009
Z010E0130:627C3AAXX:4:250028722	Z010E0130	3.005283645
Z010E0131:628DJAAXX:2:250023574	Z010E0131	3.448197971
Z010E0132:628DJAAXX:2:250023586	Z010E0132	2.710007427
Z010E0133:628DJAAXX:2:250023598	Z010E0133	2.340912155
Z010E0134:628DJAAXX:2:250023610	Z010E0134	2.082545465
Z010E0135:628DJAAXX:1:250023512	Z010E0135	2.340912155
Z010E0138:628DJAAXX:1:250023548	Z010E0138	2.710007427
Z010E0139:628DJAAXX:2:250023575	Z010E0139	1.602721611
Z010E0140:628DJAAXX:2:250023587	Z010E0140	2.864405534
Z010E0143:628DJAAXX:1:250023513	Z010E0143	3.817293243
Z010E0144:628DJAAXX:1:250023525	Z010E0144	1.971816883
Z010E0145:628DJAAXX:1:250023537	Z010E0145	3.189831281
Z010E0146:628DJAAXX:1:250023549	Z010E0146	2.435745749
Z010E0147:628DJAAXX:2:250023576	Z010E0147	1.971816883
Z010E0148:627C3AAXX:4:250028637	Z010E0148	3.449430904
Z010E0149:628DJAAXX:2:250023600	Z010E0149	1.971816883
Z010E0151:628DJAAXX:1:250023514	Z010E0151	1.971816883
Z010E0152:628DJAAXX:1:250023526	Z010E0152	3.079102699
Z010E0155:628DJAAXX:2:250023577	Z010E0155	2.864405534
Z010E0156:628DJAAXX:2:250023589	Z010E0156	2.710007427
Z010E0158:628DJAAXX:2:250023613	Z010E0158	2.864405534
Z010E0160:628DJAAXX:1:250023527	Z010E0160	3.817293243
Z010E0161:628DJAAXX:1:250023539	Z010E0161	2.710007427
Z010E0164:628DJAAXX:2:250023590	Z010E0164	1.971816883
Z010E0166:628DJAAXX:2:250023614	Z010E0166	4.112569461
Z010E0169:628DJAAXX:1:250023528	Z010E0169	2.710007427
Z010E0170:628DJAAXX:1:250023540	Z010E0170	3.189831281
Z010E0172:628DJAAXX:2:250023579	Z010E0172	3.449430904
Z010E0173:628DJAAXX:2:250023591	Z010E0173	3.928021825
Z010E0174:628DJAAXX:2:250023603	Z010E0174	3.079102699
Z010E0178:628DJAAXX:1:250023529	Z010E0178	2.710007427
Z010E0179:628DJAAXX:1:250023541	Z010E0179	2.340912155
Z010E0181:628DJAAXX:2:250023580	Z010E0181	2.864405534
Z010E0182:62P7LAAXX:6:250028276	Z010E0182	2.710007427
Z010E0185:628DJAAXX:2:250023616	Z010E0185	2.710007427
Z010E0186:628DJAAXX:1:250023530	Z010E0186	2.525459791
Z010E0188:628DJAAXX:1:250023554	Z010E0188	3.537328009
Z010E0191:628DJAAXX:2:250023605	Z010E0191	3.052064855
Z010E0192:628DJAAXX:2:250023617	Z010E0192	2.512883573
Z010E0193:62P7LAAXX:5:250028134	Z010E0193	1.971816883
Z010E0195:62P7LAAXX:5:250028154	Z010E0195	2.537536585
Z010E0198:62P7LAAXX:5:250028198	Z010E0198	2.782474214
Z010E0200:62P7LAAXX:5:250028210	Z010E0200	1.971816883
Z022E0001:709G4AAXX:5:250026610	Z022E0001	4.023807234
Z022E0002:709G4AAXX:5:250026647	Z022E0002	1.183479255
Z022E0003:709G4AAXX:5:250026630	Z022E0003	2.656688475
Z022E0004:709G4AAXX:5:250026650	Z022E0004	1.308951626
Z022E0005:709G4AAXX:5:250026662	Z022E0005	2.522611457
Z022E0006:709G4AAXX:5:250026674	Z022E0006	4.374111184
Z022E0007:709G4AAXX:5:250026686	Z022E0007	4.894298082
Z022E0008:709G4AAXX:5:250026603	Z022E0008	1.711801168
Z022E0009:709G4AAXX:5:250026611	Z022E0009	3.51405857
Z022E0010:709G4AAXX:5:250026619	Z022E0010	1.659255575
Z022E0011:709G4AAXX:5:250026631	Z022E0011	2.324833079
Z022E0012:709G4AAXX:5:250026651	Z022E0012	4.374111184
Z022E0013:709G4AAXX:5:250026663	Z022E0013	1.921983537
Z022E0014:709G4AAXX:5:250026675	Z022E0014	1.571679588
Z022E0015:709G4AAXX:5:250026687	Z022E0015	2.926441768
Z022E0016:709G4AAXX:5:250026604	Z022E0016	1.606709983
Z022E0017:709G4AAXX:5:250026612	Z022E0017	3.49835131
Z022E0018:627C3AAXX:3:250028591	Z022E0018	2.657621831
Z022E0019:709G4AAXX:5:250026632	Z022E0019	4.671869541
Z022E0020:709G4AAXX:5:250026652	Z022E0020	3.138786309
Z022E0021:709G4AAXX:5:250026664	Z022E0021	2.176287966
Z022E0023:709G4AAXX:5:250026676	Z022E0023	3.673503285
Z022E0025:709G4AAXX:5:250026640	Z022E0025	4.198959209
Z022E0027:709G4AAXX:5:250026613	Z022E0027	1.799377155
Z022E0028:627C3AAXX:3:250028508	Z022E0028	3.84865526
Z022E0029:709G4AAXX:5:250026648	Z022E0029	3.183077756
Z022E0030:709G4AAXX:5:250026653	Z022E0030	1.659255575
Z022E0031:709G4AAXX:5:250026665	Z022E0031	3.196588059
Z022E0032:709G4AAXX:5:250026677	Z022E0032	2.935818422
Z022E0033:709G4AAXX:5:250026689	Z022E0033	1.781861958
Z022E0034:709G4AAXX:5:250026641	Z022E0034	2.071663105
Z022E0035:709G4AAXX:5:250026644	Z022E0035	1.390613167
Z022E0036:627C3AAXX:3:250028516	Z022E0036	3.521006481
Z022E0037:709G4AAXX:5:250026633	Z022E0037	2.666227781
Z022E0038:709G4AAXX:5:250026654	Z022E0038	3.28816894
Z022E0039:709G4AAXX:5:250026666	Z022E0039	1.921983537
Z022E0040:709G4AAXX:5:250026678	Z022E0040	1.539254345
Z022E0041:709G4AAXX:5:250026690	Z022E0041	1.83440755
Z022E0042:709G4AAXX:5:250026605	Z022E0042	1.256406033
Z022E0043:709G4AAXX:5:250026645	Z022E0043	2.67162832
Z022E0046:709G4AAXX:5:250026649	Z022E0046	2.797743411
Z022E0047:709G4AAXX:5:250026655	Z022E0047	1.781861958
Z022E0048:709G4AAXX:5:250026667	Z022E0048	1.606709983
Z022E0049:709G4AAXX:5:250026679	Z022E0049	4.251504801
Z022E0050:627C3AAXX:3:250028524	Z022E0050	3.70853368
Z022E0051:709G4AAXX:5:250026642	Z022E0051	2.097135512
Z022E0052:709G4AAXX:5:250026646	Z022E0052	3.826739216
Z022E0053:627C3AAXX:3:250028536	Z022E0053	1.820677428
Z022E0054:709G4AAXX:5:250026634	Z022E0054	2.535015449
Z022E0056:709G4AAXX:5:250026656	Z022E0056	2.071663105
Z022E0057:709G4AAXX:5:250026668	Z022E0057	2.797743411
Z022E0058:627C3AAXX:3:250028556	Z022E0058	1.343982021
Z022E0059:709G4AAXX:5:250026692	Z022E0059	2.535015449
Z022E0061:709G4AAXX:5:250026614	Z022E0061	2.070115696
Z022E0062:709G4AAXX:5:250026625	Z022E0062	2.027646787
Z022E0063:709G4AAXX:5:250026635	Z022E0063	2.770852679
Z022E0064:709G4AAXX:5:250026657	Z022E0064	3.322562377
Z022E0065:709G4AAXX:5:250026669	Z022E0065	2.388632506
Z022E0066:709G4AAXX:5:250026681	Z022E0066	2.877024949
Z022E0067:709G4AAXX:5:250026693	Z022E0067	2.983197219
Z022E0068:709G4AAXX:5:250026643	Z022E0068	1.309453572
Z022E0069:709G4AAXX:5:250026615	Z022E0069	2.983197219
Z022E0070:709G4AAXX:5:250026626	Z022E0070	2.452335868
Z022E0071:709G4AAXX:5:250026636	Z022E0071	4.363436731
Z022E0072:709G4AAXX:5:250026658	Z022E0072	3.238010667
Z022E0073:709G4AAXX:5:250026670	Z022E0073	1.326909804
Z022E0074:709G4AAXX:5:250026682	Z022E0074	2.118225495
Z022E0075:709G4AAXX:5:250026694	Z022E0075	4.894298082
Z022E0076:709G4AAXX:5:250026607	Z022E0076	2.51603923
Z022E0077:709G4AAXX:5:250026616	Z022E0077	3.277465252
Z022E0078:709G4AAXX:5:250026627	Z022E0078	1.486637735
Z022E0079:709G4AAXX:5:250026637	Z022E0079	4.411764586
Z022E0080:709G4AAXX:5:250026659	Z022E0080	4.214795553
Z022E0081:709G4AAXX:5:250026671	Z022E0081	1.435427889
Z022E0082:709G4AAXX:5:250026683	Z022E0082	1.983430175
Z022E0083:627C3AAXX:3:250028568	Z022E0083	3.51405857
Z022E0084:709G4AAXX:5:250026608	Z022E0084	1.985177879
Z022E0085:709G4AAXX:5:250026617	Z022E0085	2.664680408
Z022E0086:709G4AAXX:5:250026628	Z022E0086	1.815302247
Z022E0087:709G4AAXX:5:250026638	Z022E0087	3.259245121
Z022E0088:709G4AAXX:5:250026660	Z022E0088	3.195541759
Z022E0089:709G4AAXX:5:250026672	Z022E0089	3.301714029
Z022E0090:627C3AAXX:4:250028658	Z022E0090	2.239991328
Z022E0091:709G4AAXX:5:250026696	Z022E0091	2.600977046
Z022E0092:709G4AAXX:5:250026618	Z022E0092	2.72838377
Z022E0093:709G4AAXX:5:250026629	Z022E0093	2.070115696
Z022E0094:709G4AAXX:5:250026639	Z022E0094	1.433082075
Z022E0095:709G4AAXX:5:250026661	Z022E0095	1.326909804
Z022E0096:709G4AAXX:5:250026673	Z022E0096	2.600977046
Z022E0097:709G4AAXX:5:250026685	Z022E0097	1.433082075
Z022E0098:709G4AAXX:5:250026697	Z022E0098	2.983197219
Z022E0099:709G4AAXX:6:250026737	Z022E0099	2.600977046
Z022E0100:709G4AAXX:6:250026774	Z022E0100	4.04491992
Z022E0101:627C3AAXX:3:250028580	Z022E0101	4.257264461
Z022E0102:627C3AAXX:3:250028592	Z022E0102	3.046900581
Z022E0103:709G4AAXX:6:250026789	Z022E0103	2.877024949
Z022E0104:709G4AAXX:6:250026801	Z022E0104	3.195541759
Z022E0105:709G4AAXX:6:250026813	Z022E0105	1.857771155
Z022E0106:709G4AAXX:6:250026730	Z022E0106	2.600977046
Z022E0107:709G4AAXX:6:250026738	Z022E0107	1.433082075
Z022E0108:709G4AAXX:6:250026746	Z022E0108	2.027646787
Z022E0109:709G4AAXX:6:250026758	Z022E0109	3.466178701
Z022E0110:709G4AAXX:6:250026778	Z022E0110	2.813321587
Z022E0111:709G4AAXX:6:250026790	Z022E0111	2.40986696
Z022E0112:709G4AAXX:6:250026802	Z022E0112	1.326909804
Z022E0113:709G4AAXX:6:250026814	Z022E0113	4.212211492
Z022E0114:709G4AAXX:6:250026731	Z022E0114	3.196588059
Z022E0115:709G4AAXX:6:250026739	Z022E0115	3.089369489
Z022E0116:709G4AAXX:6:250026747	Z022E0116	3.556527478
Z022E0117:709G4AAXX:6:250026759	Z022E0117	1.879005609
Z022E0118:709G4AAXX:6:250026779	Z022E0118	1.751598885
Z022E0119:709G4AAXX:6:250026791	Z022E0119	3.089369489
Z022E0120:709G4AAXX:6:250026803	Z022E0120	3.72640311
Z022E0121:709G4AAXX:6:250026815	Z022E0121	3.259245121
Z022E0123:709G4AAXX:6:250026740	Z022E0123	1.539254345
Z022E0124:709G4AAXX:6:250026748	Z022E0124	1.539254345
Z022E0125:709G4AAXX:6:250026775	Z022E0125	1.435427889
Z022E0126:709G4AAXX:6:250026780	Z022E0126	2.239991328
Z022E0127:709G4AAXX:6:250026792	Z022E0127	2.558508138
Z022E0128:709G4AAXX:6:250026804	Z022E0128	2.919493857
Z022E0129:709G4AAXX:6:250026816	Z022E0129	3.407886299
Z022E0130:709G4AAXX:6:250026768	Z022E0130	1.929512047
Z022E0131:709G4AAXX:6:250026771	Z022E0131	3.195541759
Z022E0132:709G4AAXX:6:250026749	Z022E0132	2.983197219
Z022E0133:709G4AAXX:6:250026760	Z022E0133	2.027646787
Z022E0134:709G4AAXX:6:250026781	Z022E0134	4.996789956
Z022E0135:709G4AAXX:6:250026793	Z022E0135	3.981216558
Z022E0136:709G4AAXX:6:250026805	Z022E0136	1.985177879
Z022E0137:709G4AAXX:6:250026817	Z022E0137	2.346163598
Z022E0138:709G4AAXX:6:250026732	Z022E0138	2.017301858
Z022E0139:709G4AAXX:6:250026772	Z022E0139	3.33138338
Z022E0140:709G4AAXX:6:250026750	Z022E0140	4.15109219
Z022E0141:627C3AAXX:3:250028509	Z022E0141	3.875044288
Z022E0142:709G4AAXX:6:250026782	Z022E0142	2.468693329
Z022E0145:709G4AAXX:6:250026806	Z022E0145	1.326909804
Z022E0146:709G4AAXX:6:250026818	Z022E0146	3.195541759
Z022E0147:627C3AAXX:3:250028517	Z022E0147	1.539254345
Z022E0148:709G4AAXX:6:250026773	Z022E0148	2.729462966
Z022E0149:709G4AAXX:6:250026751	Z022E0149	4.15109219
Z022E0150:709G4AAXX:6:250026761	Z022E0150	2.813321587
Z022E0151:709G4AAXX:6:250026783	Z022E0151	4.670515582
Z022E0153:709G4AAXX:6:250026807	Z022E0153	1.579044213
Z022E0154:627C3AAXX:3:250028525	Z022E0154	1.326909804
Z022E0155:627C3AAXX:3:250028537	Z022E0155	4.15109219
Z022E0156:709G4AAXX:6:250026741	Z022E0156	3.662699748
Z022E0157:709G4AAXX:6:250026752	Z022E0157	4.535720261
Z022E0158:709G4AAXX:6:250026762	Z022E0158	2.071663105
Z022E0159:709G4AAXX:6:250026784	Z022E0159	4.411764586
Z022E0160:627C3AAXX:3:250028557	Z022E0160	3.450355207
Z022E0161:709G4AAXX:6:250026808	Z022E0161	1.486637735
Z022E0162:709G4AAXX:6:250026820	Z022E0162	3.241713846
Z022E0163:709G4AAXX:6:250026770	Z022E0163	1.326909804
Z022E0164:709G4AAXX:6:250026742	Z022E0164	3.089369489
Z022E0165:709G4AAXX:6:250026753	Z022E0165	1.751598885
Z022E0166:709G4AAXX:6:250026763	Z022E0166	2.600977046
Z022E0167:709G4AAXX:6:250026785	Z022E0167	3.268644248
Z022E0168:627C3AAXX:3:250028569	Z022E0168	4.411764586
Z022E0169:709G4AAXX:6:250026809	Z022E0169	3.412260572
Z022E0170:709G4AAXX:6:250026821	Z022E0170	3.875044288
Z022E0171:709G4AAXX:6:250026734	Z022E0171	2.133819058
Z022E0172:709G4AAXX:6:250026743	Z022E0172	1.435427889
Z022E0173:709G4AAXX:6:250026754	Z022E0173	2.656688475
Z022E0174:709G4AAXX:6:250026764	Z022E0174	2.558867972
Z022E0175:709G4AAXX:6:250026786	Z022E0175	2.926997418
Z022E0176:709G4AAXX:6:250026798	Z022E0176	2.983197219
Z022E0177:627C3AAXX:3:250028581	Z022E0177	3.547055893
Z022E0178:709G4AAXX:6:250026822	Z022E0178	2.558508138
Z022E0179:709G4AAXX:6:250026735	Z022E0179	2.346163598
Z022E0180:709G4AAXX:6:250026744	Z022E0180	1.279111314
Z022E0181:709G4AAXX:6:250026755	Z022E0181	3.124587674
Z022E0182:627C3AAXX:3:250028593	Z022E0182	1.929512047
Z022E0183:709G4AAXX:6:250026787	Z022E0183	3.407886299
Z022E0184:709G4AAXX:6:250026799	Z022E0184	3.046900581
Z022E0185:709G4AAXX:6:250026811	Z022E0185	2.071663105
Z022E0186:709G4AAXX:6:250026823	Z022E0186	2.983197219
Z022E0187:709G4AAXX:6:250026745	Z022E0187	2.176287966
Z022E0188:709G4AAXX:6:250026756	Z022E0188	1.602957707
Z022E0189:709G4AAXX:6:250026766	Z022E0189	1.579044213
Z022E0190:709G4AAXX:6:250026788	Z022E0190	2.877024949
Z022E0191:709G4AAXX:6:250026800	Z022E0191	1.256406033
Z022E0192:709G4AAXX:6:250026812	Z022E0192	2.940728311
Z022E0193:709G4AAXX:6:250026824	Z022E0193	2.300501282
Z022E0194:627C3AAXX:3:250028545	Z022E0194	1.751598885
Z022E0195:627C3AAXX:3:250028518	Z022E0195	3.241713846
Z022E0196:627C3AAXX:3:250028526	Z022E0196	3.870564662
Z022E0197:627C3AAXX:3:250028553	Z022E0197	4.600968763
Z022E0198:627C3AAXX:3:250028558	Z022E0198	1.606709983
Z022E0199:627C3AAXX:3:250028570	Z022E0199	1.606709983
Z022E0200:627C3AAXX:3:250028582	Z022E0200	3.826739216
Z024E0001:MRG:2:250027118	Z024E0001	2.135276276
Z024E0004:MRG:2:250027138	Z024E0004	1.865685635
Z024E0006:MRG:2:250027170	Z024E0006	3.159720712
Z024E0009:D260TACXX:5:250183137	Z024E0009	2.315914766
Z024E0010:627C3AAXX:2:250028393	Z024E0010	2.000480955
Z024E0011:MRG:2:250027119	Z024E0011	4.372878596
Z024E0012:MRG:2:250027127	Z024E0012	3.752820122
Z024E0016:D260TACXX:5:250183138	Z024E0016	3.21363884
Z024E0017:627C3AAXX:2:250028404	Z024E0017	3.429311353
Z024E0020:MRG:2:250027120	Z024E0020	3.423200582
Z024E0021:MRG:2:250027128	Z024E0021	2.845133016
Z024E0022:MRG:2:250027140	Z024E0022	3.698901994
Z024E0024:MRG:2:250027172	Z024E0024	3.423200582
Z024E0025:MRG:2:250027184	Z024E0025	3.238652946
Z024E0026:MRG:2:250027196	Z024E0026	1.9347427
Z024E0027:MRG:2:250027148	Z024E0027	2.672933244
Z024E0029:MRG:2:250027129	Z024E0029	2.135276276
Z024E0030:627C3AAXX:2:250028414	Z024E0030	1.865685635
Z024E0032:MRG:2:250027173	Z024E0032	2.396254745
Z024E0033:MRG:2:250027185	Z024E0033	2.350948788
Z024E0037:MRG:2:250027130	Z024E0037	1.865685635
Z024E0038:627C3AAXX:4:250028714	Z024E0038	2.539662237
Z024E0040:MRG:2:250027174	Z024E0040	3.423200582
Z024E0041:MRG:2:250027186	Z024E0041	3.05410531
Z024E0042:MRG:2:250027198	Z024E0042	3.429311353
Z024E0044:MRG:2:250027153	Z024E0044	2.539662237
Z024E0045:MRG:2:250027131	Z024E0045	3.024925391
Z024E0047:MRG:2:250027163	Z024E0047	3.698901994
Z024E0048:MRG:2:250027175	Z024E0048	3.21363884
Z024E0049:MRG:2:250027187	Z024E0049	2.404866917
Z024E0050:MRG:2:250027199	Z024E0050	2.315914766
Z024E0051:MRG:2:250027150	Z024E0051	1.865685635
Z024E0054:MRG:2:250027142	Z024E0054	1.9347427
Z024E0056:MRG:2:250027176	Z024E0056	2.869557674
Z024E0057:627C3AAXX:4:250028726	Z024E0057	1.865685635
Z024E0058:MRG:2:250027200	Z024E0058	2.135276276
Z024E0059:MRG:2:250027114	Z024E0059	2.350948788
Z024E0060:MRG:2:250027122	Z024E0060	2.485744109
Z024E0061:MRG:2:250027133	Z024E0061	2.75533475
Z024E0063:MRG:2:250027165	Z024E0063	3.042028516
Z024E0069:MRG:2:250027189	Z024E0069	2.869557674
Z024E0070:627C3AAXX:4:250028639	Z024E0070	2.599114189
Z024E0071:MRG:2:250027151	Z024E0071	2.216153468
Z024E0072:MRG:2:250027123	Z024E0072	2.135276276
Z024E0074:MRG:2:250027144	Z024E0074	2.944048199
Z024E0075:627C3AAXX:4:250028648	Z024E0075	2.944048199
Z024E0076:MRG:2:250027178	Z024E0076	2.674457558
Z024E0077:627C3AAXX:2:250028436	Z024E0077	3.706400006
Z024E0078:MRG:2:250027202	Z024E0078	1.865685635
Z024E0079:MRG:2:250027115	Z024E0079	4.530486398
Z024E0080:627C3AAXX:2:250028448	Z024E0080	2.674457558
Z024E0081:627C3AAXX:4:250028659	Z024E0081	3.722671072
Z024E0082:MRG:2:250027145	Z024E0082	2.488385608
Z024E0083:MRG:2:250027167	Z024E0083	2.414566553
Z024E0084:MRG:2:250027179	Z024E0084	3.042028516
Z024E0085:MRG:2:250027191	Z024E0085	2.669625405
Z024E0086:MRG:2:250027203	Z024E0086	2.119290336
Z024E0087:MRG:2:250027116	Z024E0087	2.783661825
Z024E0088:MRG:2:250027125	Z024E0088	2.303837972
Z024E0090:MRG:2:250027146	Z024E0090	1.750195064
Z024E0091:MRG:2:250027168	Z024E0091	2.045471281
Z024E0093:MRG:2:250027192	Z024E0093	2.396254745
Z024E0094:MRG:2:250027204	Z024E0094	3.337304733
Z024E0095:MRG:2:250027126	Z024E0095	1.811229375
Z024E0096:MRG:2:250027137	Z024E0096	2.119290336
Z024E0097:MRG:2:250027147	Z024E0097	3.337304733
Z024E0098:MRG:2:250027169	Z024E0098	1.750195064
Z024E0099:MRG:2:250027181	Z024E0099	3.521852369
Z024E0100:627C3AAXX:4:250028691	Z024E0100	1.9347427
Z024E0101:MRG:2:250027205	Z024E0101	2.119290336
Z024E0103:627C3AAXX:4:250028703	Z024E0103	2.396254745
Z024E0104:70980AAXX:3:250027265	Z024E0104	1.750195064
Z024E0105:70980AAXX:3:250027285	Z024E0105	2.303837972
Z024E0106:MRG:2:250042613	Z024E0106	2.119290336
Z024E0107:MRG:2:250042614	Z024E0107	1.750195064
Z024E0108:70980AAXX:3:250027321	Z024E0108	1.860923645
Z024E0110:70980AAXX:3:250027246	Z024E0110	3.595671424
Z024E0111:70980AAXX:3:250027254	Z024E0111	2.968209461
Z024E0112:70980AAXX:3:250027266	Z024E0112	3.337304733
Z024E0113:MRG:2:250042615	Z024E0113	3.226576152
Z024E0114:70980AAXX:3:250027298	Z024E0114	2.488385608
Z024E0115:70980AAXX:3:250027310	Z024E0115	2.084600035
Z024E0116:MRG:2:250042616	Z024E0116	2.85748088
Z024E0117:70980AAXX:3:250027239	Z024E0117	2.216153468
Z024E0118:70980AAXX:3:250027247	Z024E0118	3.595671424
Z024E0119:70980AAXX:3:250027255	Z024E0119	2.981280115
Z024E0120:70980AAXX:3:250027267	Z024E0120	2.119290336
Z024E0121:70980AAXX:3:250027287	Z024E0121	2.674457558
Z024E0122:70980AAXX:3:250027299	Z024E0122	2.119290336
Z024E0123:70980AAXX:3:250027311	Z024E0123	2.488385608
Z024E0124:70980AAXX:3:250027323	Z024E0124	2.414566553
Z024E0126:70980AAXX:3:250027248	Z024E0126	1.811229375
Z024E0127:70980AAXX:3:250027256	Z024E0127	2.845133016
Z024E0128:70980AAXX:3:250027283	Z024E0128	1.811229375
Z024E0129:70980AAXX:3:250027288	Z024E0129	2.303837972
Z024E0131:70980AAXX:3:250027312	Z024E0131	2.599114189
Z024E0133:70980AAXX:3:250027276	Z024E0133	2.599114189
Z024E0135:70980AAXX:3:250027257	Z024E0135	3.137645701
Z024E0136:70980AAXX:3:250027268	Z024E0136	2.968209461
Z024E0137:70980AAXX:3:250027289	Z024E0137	2.672933244
Z024E0138:70980AAXX:3:250027301	Z024E0138	2.85748088
Z024E0141:70980AAXX:3:250027240	Z024E0141	2.783661825
Z024E0144:70980AAXX:3:250027284	Z024E0144	3.273792801
Z024E0145:70980AAXX:3:250027290	Z024E0145	2.303837972
Z024E0146:70980AAXX:3:250027302	Z024E0146	2.599114189
Z024E0152:70980AAXX:3:250027269	Z024E0152	3.254650775
Z024E0157:627C3AAXX:2:250028472	Z024E0157	3.042028516
Z024E0158:70980AAXX:3:250027249	Z024E0158	2.119290336
Z024E0159:70980AAXX:3:250027260	Z024E0159	3.890947642
Z024E0161:70980AAXX:3:250027292	Z024E0161	2.981280115
Z024E0163:70980AAXX:3:250027316	Z024E0163	3.273792801
Z024E0164:70980AAXX:3:250027328	Z024E0164	1.811229375
Z024E0165:70980AAXX:3:250027278	Z024E0165	2.672933244
Z024E0172:70980AAXX:3:250027329	Z024E0172	3.152757097
Z024E0186:70980AAXX:3:250027295	Z024E0186	2.818073882
Z024E0187:70980AAXX:3:250027307	Z024E0187	1.596094994
Z024E0188:70980AAXX:3:250027319	Z024E0188	3.97684349
Z024E0192:70980AAXX:3:250027274	Z024E0192	3.21363884
Z024E0195:70980AAXX:3:250027320	Z024E0195	4.426796725
Z024E0198:627C3AAXX:2:250028394	Z024E0198	3.226576152
Z024E0199:627C3AAXX:2:250028405	Z024E0199	3.833697314
